# Supplementary material for: Solvent-free synthesis of a formaldehyde-free benzoxazine monomer: study of its curing acceleration effect for commercial benzoxazine
Source: Royal Society of Chemistry journal article supplement (doi:10.1039/d2py00462c), 2022-01-01
Supplement: d2py00462c1.pdf [file d2py00462c1.pdf]

## Supporting information for : Solvent-free synthesis of a formaldehyde-free benzoxazine monomer: Study of its curing acceleration effect for commercial benzoxazine

Romain Tavernier<sup>1,2,\*</sup>, Lérys Granado<sup>1</sup>, Monique Tillard<sup>1</sup>, Louis Van Renterghem<sup>2</sup>, Thomas-Xavier Métro<sup>3</sup>, Frédéric Lamaty<sup>3</sup>, Leila Bonnaud<sup>2</sup>, Jean-Marie Raquez<sup>2,\*</sup>, Ghislain David<sup>1</sup>, Sylvain Caillol<sup>1</sup>

1. ICGM, Univ Montpellier, CNRS, ENSCM, Montpellier, France. E-Mail: romain.tavernier@gmail.com
2. Laboratory of Polymeric and Composite Materials (LPCM), Center of Innovation and Research in Materials, Materia Nova Research Center & University of Mons (UMONS), Place du Parc 20, 7000 Mons, Belgium. E-mail: jean-marie.raquez@umons.ac.be
3. IBMM, Univ Montpellier, CNRS, ENSCM, Montpellier, France.

### NMR Spectroscopy

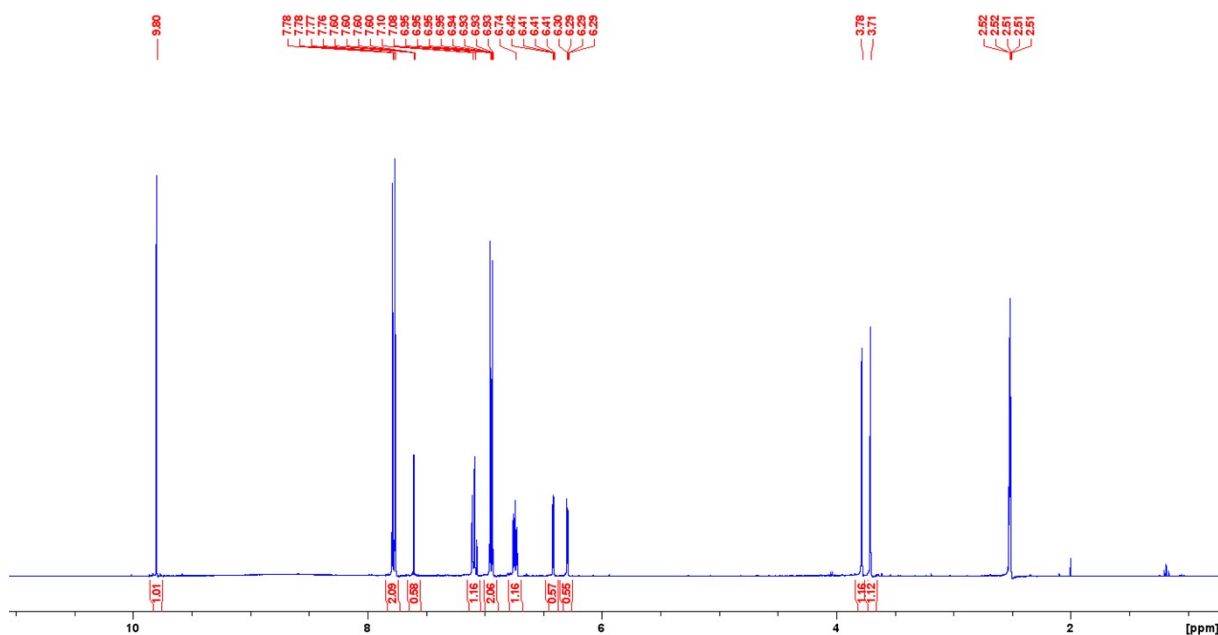

Figure S1 - <sup>1</sup>H NMR spectrum of an equimolar mixture of furfurylaminomethylphenol and p-hydroxybenzaldehyde in dmsO-d<sub>6</sub>



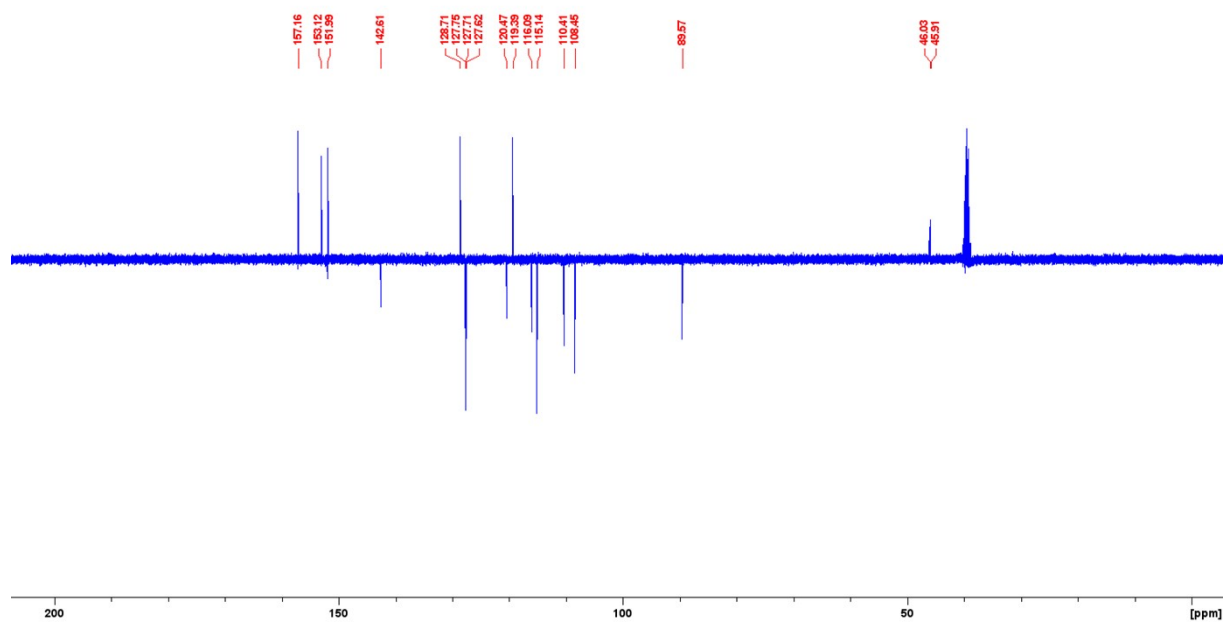

Figure S4 - Full  $^{13}\text{C}$  NMR spectrum of an APT experiment on Ph-fa[2]PhOH in  $\text{dms0-d}_6$  (showing secondary and quaternary  $^{13}\text{C}$  positive (up) and primary or tertiary  $^{13}\text{C}$  negative (down))

FTIR spectroscopy

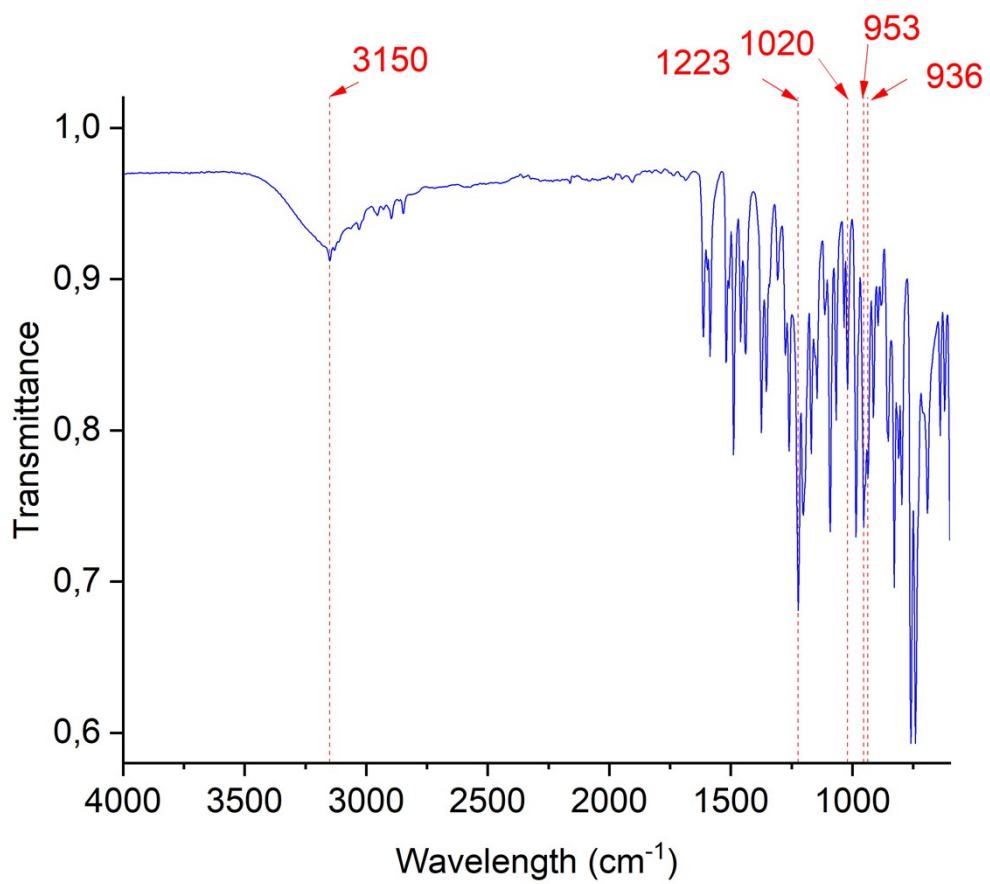

Figure S5 - Full IR spectrum of Ph-fa[2]PhOH

## Single crystals X-ray Diffraction

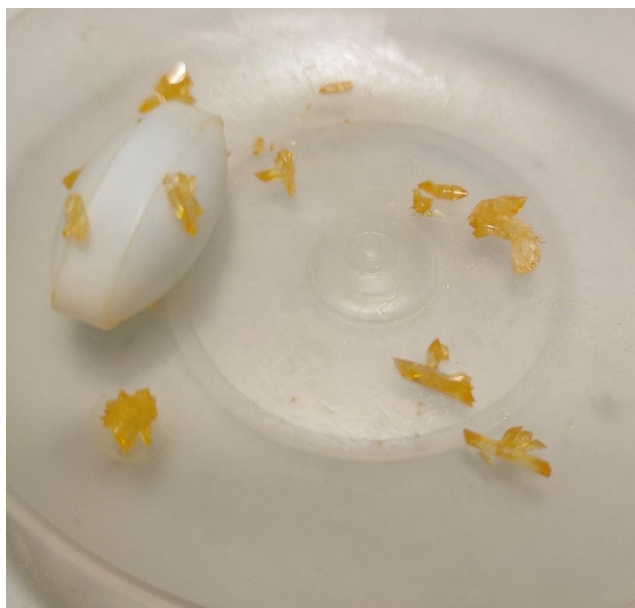

*Figure S6 - Picture of single crystals of Ph-fa[2]PhOH*

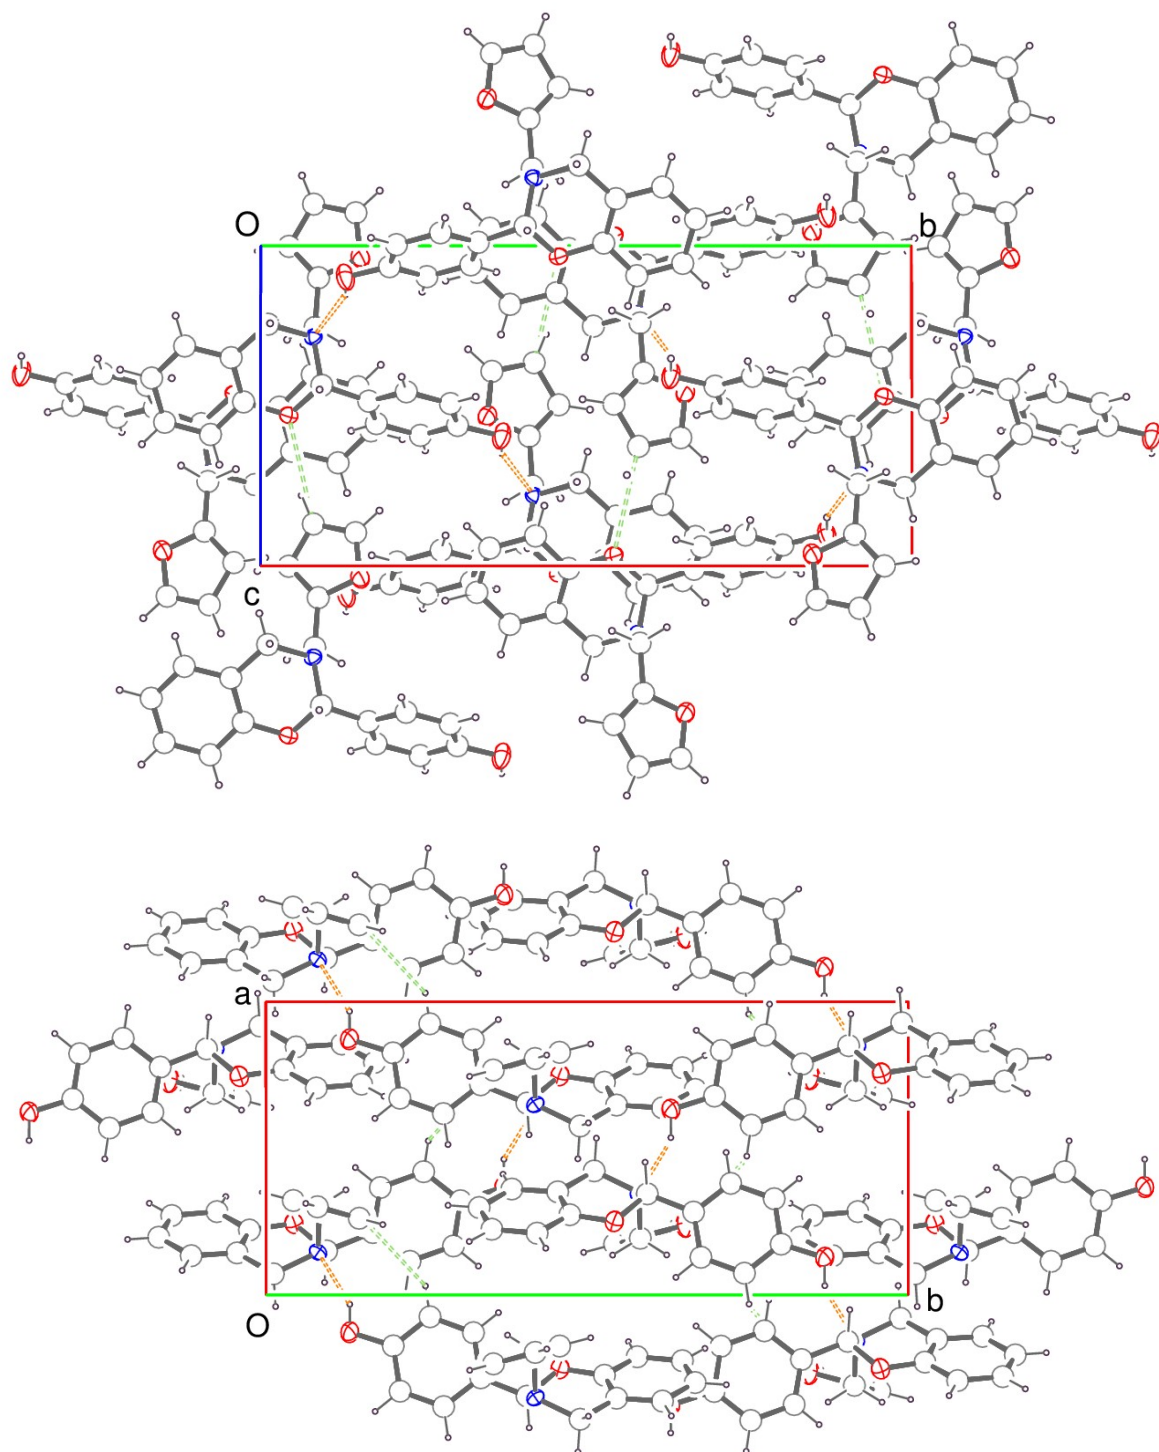

Figure S7 -The molecular packing in the crystal, viewed along the a-axis (up) and c-axis (down). The intermolecular interactions are drawn as dashed lines, green for the 3.267 Å weak O1...C12 interactions and orange for the O3...N hydrogen bonds of 2.821Å

Table S1 - Atomic coordinates ( $\times 10^4$ ) and equivalent isotropic displacement parameters ( $\text{\AA}^2 \times 10^3$ ) for  $C_{19}H_{17}NO_3$ .  $U(\text{eq})$  is defined as one-third of the trace of the orthogonalized  $U_{ij}$  tensor.

| Atoms | <i>x</i> | <i>y</i> | <i>z</i> | <i>U</i> (eq) |
|-------|----------|----------|----------|---------------|
| N     | 3519(1)  | 5804(1)  | 2141(1)  | 25(1)         |
| C(4)  | 2241(2)  | 3517(1)  | -534(2)  | 45(1)         |
| C(5)  | 2994(2)  | 3318(1)  | 852(2)   | 46(1)         |
| C(7)  | 3534(1)  | 4541(1)  | 1495(1)  | 30(1)         |
| C(8)  | 4259(1)  | 5110(1)  | 2545(1)  | 29(1)         |
| C(9)  | 1958(1)  | 5828(1)  | 2427(1)  | 29(1)         |
| C(10) | 2038(1)  | 5880(1)  | 3982(1)  | 27(1)         |
| C(11) | 2389(2)  | 6454(1)  | 6016(1)  | 42(1)         |
| C(12) | 2000(2)  | 5804(1)  | 6283(1)  | 43(1)         |
| C(13) | 1774(2)  | 5426(1)  | 4962(1)  | 40(1)         |
| C(14) | 2830(1)  | 6657(1)  | 127(1)   | 26(1)         |
| C(15) | 1284(1)  | 6772(1)  | -587(1)  | 29(1)         |
| C(16) | 737(1)   | 7448(1)  | -960(1)  | 31(1)         |
| C(17) | 1733(1)  | 8021(1)  | -640(1)  | 33(1)         |
| C(18) | 3285(1)  | 7913(1)  | 56(2)    | 39(1)         |
| C(19) | 3815(1)  | 7236(1)  | 430(1)   | 34(1)         |
| C(6)  | 3633(1)  | 3827(1)  | 1857(2)  | 38(1)         |
| O(1)  | 2510(1)  | 5424(1)  | -314(1)  | 32(1)         |
| C(1)  | 3458(1)  | 5936(1)  | 629(1)   | 26(1)         |
| O(2)  | 2429(1)  | 6525(1)  | 4609(1)  | 40(1)         |
| C(2)  | 2742(1)  | 4731(1)  | 105(1)   | 29(1)         |
| O(3)  | 1266(1)  | 8698(1)  | -973(1)  | 47(1)         |
| C(3)  | 2103(1)  | 4222(1)  | -919(2)  | 37(1)         |

Table S2 - Bond lengths (Å) for C<sub>19</sub>H<sub>17</sub>N O<sub>3</sub>.

| Bond        | Bond length (Å) | Bond        | Bond length (Å) |
|-------------|-----------------|-------------|-----------------|
| N-C(1)      | 1.4619(13)      | C(12)-H(12) | 0.9500          |
| N-C(8)      | 1.4800(13)      | C(13)-H(13) | 0.9500          |
| N-C(9)      | 1.4837(14)      | C(14)-C(19) | 1.3898(16)      |
| C(4)-C(3)   | 1.3830(19)      | C(14)-C(15) | 1.3947(15)      |
| C(4)-C(5)   | 1.386(2)        | C(14)-C(1)  | 1.5091(14)      |
| C(4)-H(4)   | 0.9500          | C(15)-C(16) | 1.3866(15)      |
| C(5)-C(6)   | 1.3828(19)      | C(15)-H(15) | 0.9500          |
| C(5)-H(5)   | 0.9500          | C(16)-C(17) | 1.3868(16)      |
| C(7)-C(2)   | 1.3932(16)      | C(16)-H(16) | 0.9500          |
| C(7)-C(6)   | 1.3954(16)      | C(17)-O(3)  | 1.3625(14)      |
| C(7)-C(8)   | 1.5069(15)      | C(17)-C(18) | 1.3936(17)      |
| C(8)-H(8A)  | 0.9900          | C(18)-C(19) | 1.3842(17)      |
| C(8)-H(8B)  | 0.9900          | C(18)-H(18) | 0.9500          |
| C(9)-C(10)  | 1.4812(15)      | C(19)-H(19) | 0.9500          |
| C(9)-H(9A)  | 0.9900          | C(6)-H(6)   | 0.9500          |
| C(9)-H(9B)  | 0.9900          | O(1)-C(2)   | 1.3744(14)      |
| C(10)-C(13) | 1.3394(16)      | O(1)-C(1)   | 1.4479(13)      |
| C(10)-O(2)  | 1.3679(13)      | C(1)-H(1)   | 1.0000          |
| C(11)-C(12) | 1.322(2)        | C(2)-C(3)   | 1.3945(16)      |
| C(11)-O(2)  | 1.3677(15)      | O(3)-H(1O)  | 0.88(2)         |
| C(11)-H(11) | 0.9500          | C(3)-H(3)   | 0.9500          |
| C(12)-C(13) | 1.4279(18)      |             |                 |



Table S3 - Bond angles (°) for C<sub>19</sub>H<sub>17</sub>NO<sub>3</sub>.

| Bond             | Angle (°)  | Bond              | Angle (°)  | Bond              | Angle (°)  | Bond             | Angle (°)  |
|------------------|------------|-------------------|------------|-------------------|------------|------------------|------------|
| C(1)-N-C(8)      | 108.46(8)  | C(10)-C(9)-N      | 112.19(9)  | C(19)-C(14)-C(15) | 118.33(10) | C(5)-C(6)-C(7)   | 120.88(13) |
| C(1)-N-C(9)      | 112.02(8)  | C(10)-C(9)-H(9A)  | 109.2      | C(19)-C(14)-C(1)  | 118.86(9)  | C(5)-C(6)-H(6)   | 119.6      |
| C(8)-N-C(9)      | 110.82(8)  | N-C(9)-H(9A)      | 109.2      | C(15)-C(14)-C(1)  | 122.77(10) | C(7)-C(6)-H(6)   | 119.6      |
| C(3)-C(4)-C(5)   | 120.60(12) | C(10)-C(9)-H(9B)  | 109.2      | C(16)-C(15)-C(14) | 120.79(10) | C(2)-O(1)-C(1)   | 115.88(8)  |
| C(3)-C(4)-H(4)   | 119.7      | N-C(9)-H(9B)      | 109.2      | C(16)-C(15)-H(15) | 119.6      | O(1)-C(1)-N      | 112.20(9)  |
| C(5)-C(4)-H(4)   | 119.7      | H(9A)-C(9)-H(9B)  | 107.9      | C(14)-C(15)-H(15) | 119.6      | O(1)-C(1)-C(14)  | 107.15(8)  |
| C(6)-C(5)-C(4)   | 119.85(12) | C(13)-C(10)-O(2)  | 109.49(10) | C(15)-C(16)-C(17) | 120.15(10) | N-C(1)-C(14)     | 113.03(8)  |
| C(6)-C(5)-H(5)   | 120.1      | C(13)-C(10)-C(9)  | 133.90(11) | C(15)-C(16)-H(16) | 119.9      | O(1)-C(1)-H(1)   | 108.1      |
| C(4)-C(5)-H(5)   | 120.1      | O(2)-C(10)-C(9)   | 116.59(9)  | C(17)-C(16)-H(16) | 119.9      | N-C(1)-H(1)      | 108.1      |
| C(2)-C(7)-C(6)   | 118.34(11) | C(12)-C(11)-O(2)  | 110.83(11) | O(3)-C(17)-C(16)  | 122.95(10) | C(14)-C(1)-H(1)  | 108.1      |
| C(2)-C(7)-C(8)   | 119.21(10) | C(12)-C(11)-H(11) | 124.6      | O(3)-C(17)-C(18)  | 117.36(11) | C(11)-O(2)-C(10) | 106.39(9)  |
| C(6)-C(7)-C(8)   | 122.45(11) | O(2)-C(11)-H(11)  | 124.6      | C(16)-C(17)-C(18) | 119.69(11) | O(1)-C(2)-C(7)   | 122.02(10) |
| N-C(8)-C(7)      | 111.79(9)  | C(11)-C(12)-C(13) | 106.29(11) | C(19)-C(18)-C(17) | 119.60(11) | O(1)-C(2)-C(3)   | 116.75(11) |
| N-C(8)-H(8A)     | 109.3      | C(11)-C(12)-H(12) | 126.9      | C(19)-C(18)-H(18) | 120.2      | C(7)-C(2)-C(3)   | 121.21(11) |
| C(7)-C(8)-H(8A)  | 109.3      | C(13)-C(12)-H(12) | 126.9      | C(17)-C(18)-H(18) | 120.2      | C(17)-O(3)-H(10) | 109.5(13)  |
| N-C(8)-H(8B)     | 109.3      | C(10)-C(13)-C(12) | 106.99(12) | C(18)-C(19)-C(14) | 121.42(10) | C(4)-C(3)-C(2)   | 119.10(13) |
| C(7)-C(8)-H(8B)  | 109.3      | C(10)-C(13)-H(13) | 126.5      | C(18)-C(19)-H(19) | 119.3      | C(4)-C(3)-H(3)   | 120.5      |
| H(8A)-C(8)-H(8B) | 107.9      | C(12)-C(13)-H(13) | 126.5      | C(14)-C(19)-H(19) | 119.3      | C(2)-C(3)-H(3)   | 120.5      |

Table 4 - Anisotropic displacement parameters ( $\text{\AA}^2 \times 10^3$ ) for  $C_{19}H_{17}NO_3$ . The anisotropic displacement factor exponent takes the form:  $-2\pi^2 [h^2 a^{*2} U_{11} + \dots + 2 h k a^* b^* U_{12}]$

| Atoms | $U_{11}$ | $U_{22}$ | $U_{33}$ | $U_{23}$ | $U_{13}$ | $U_{12}$ |
|-------|----------|----------|----------|----------|----------|----------|
| N     | 24(1)    | 27(1)    | 23(1)    | 2(1)     | 4(1)     | 4(1)     |
| C(4)  | 32(1)    | 36(1)    | 67(1)    | -17(1)   | 9(1)     | -5(1)    |
| C(5)  | 37(1)    | 28(1)    | 74(1)    | -3(1)    | 13(1)    | -2(1)    |
| C(7)  | 24(1)    | 28(1)    | 36(1)    | -1(1)    | 8(1)     | 2(1)     |
| C(8)  | 28(1)    | 27(1)    | 30(1)    | 2(1)     | 3(1)     | 5(1)     |
| C(9)  | 25(1)    | 37(1)    | 25(1)    | 3(1)     | 6(1)     | 5(1)     |
| C(10) | 27(1)    | 28(1)    | 27(1)    | 1(1)     | 7(1)     | 4(1)     |
| C(11) | 47(1)    | 48(1)    | 31(1)    | -11(1)   | 10(1)    | 5(1)     |
| C(12) | 53(1)    | 52(1)    | 26(1)    | 7(1)     | 12(1)    | 14(1)    |
| C(13) | 56(1)    | 33(1)    | 34(1)    | 5(1)     | 18(1)    | 1(1)     |
| C(14) | 28(1)    | 31(1)    | 21(1)    | 2(1)     | 7(1)     | 3(1)     |
| C(15) | 28(1)    | 31(1)    | 26(1)    | 1(1)     | 4(1)     | -2(1)    |
| C(16) | 26(1)    | 35(1)    | 29(1)    | 5(1)     | 1(1)     | 2(1)     |
| C(17) | 34(1)    | 30(1)    | 33(1)    | 5(1)     | 2(1)     | 2(1)     |
| C(18) | 32(1)    | 32(1)    | 47(1)    | 5(1)     | -2(1)    | -4(1)    |
| C(19) | 26(1)    | 37(1)    | 34(1)    | 5(1)     | 1(1)     | 1(1)     |
| C(6)  | 31(1)    | 30(1)    | 53(1)    | 5(1)     | 9(1)     | 2(1)     |
| O(1)  | 39(1)    | 30(1)    | 24(1)    | -2(1)    | 3(1)     | 2(1)     |
| C(1)  | 26(1)    | 30(1)    | 24(1)    | 0(1)     | 6(1)     | 2(1)     |
| O(2)  | 56(1)    | 30(1)    | 38(1)    | -4(1)    | 20(1)    | -2(1)    |
| C(2)  | 25(1)    | 30(1)    | 34(1)    | -4(1)    | 9(1)     | 2(1)     |
| O(3)  | 39(1)    | 29(1)    | 60(1)    | 9(1)     | -9(1)    | 1(1)     |
| C(3)  | 28(1)    | 40(1)    | 43(1)    | -11(1)   | 7(1)     | -1(1)    |

DSC

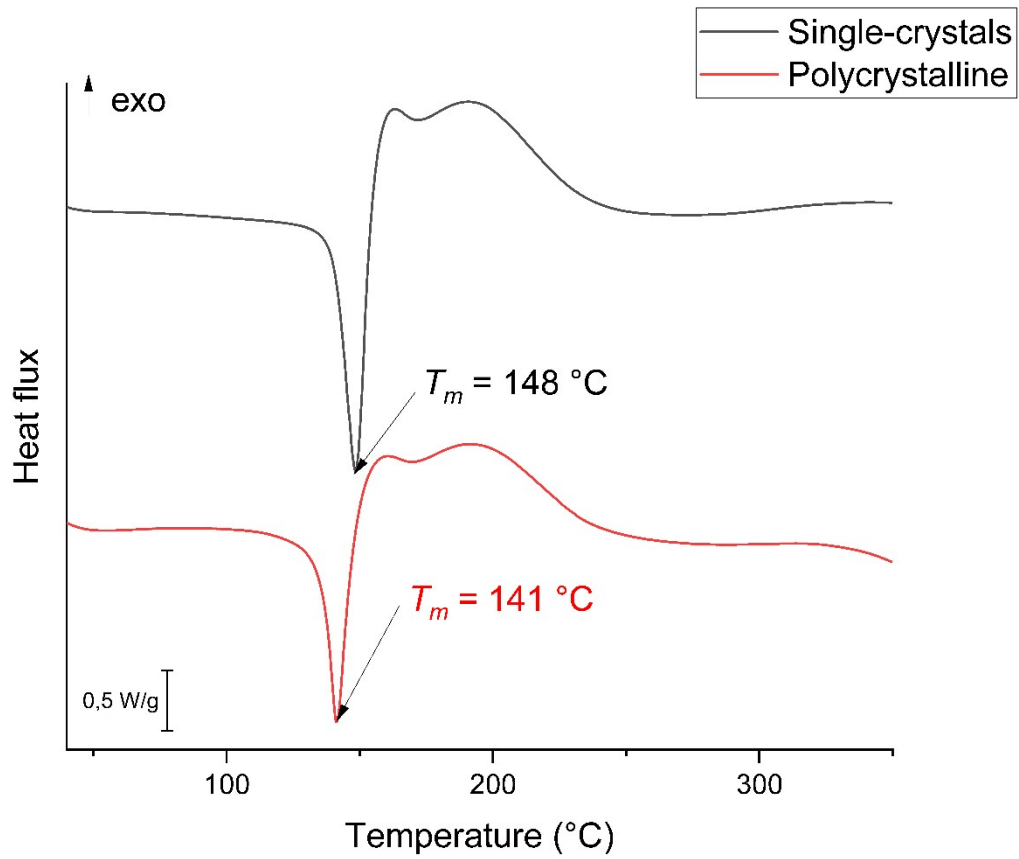

Figure S8 - DSC thermograms of Ph-fa[2]PhOH at  $10\text{ °C}\cdot\text{min}^{-1}$ . Upper thermogram corresponds to single-crystals, bottom thermogram corresponds to polycrystalline sample.

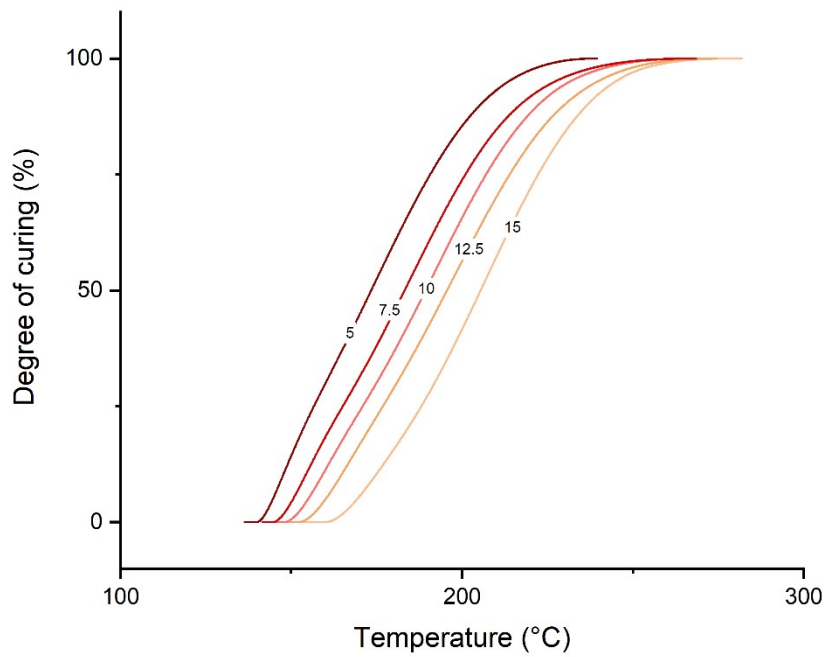

Figure S9 - DSC integrals of Ph-fa[2]PhOH at different heating rates

Rheology

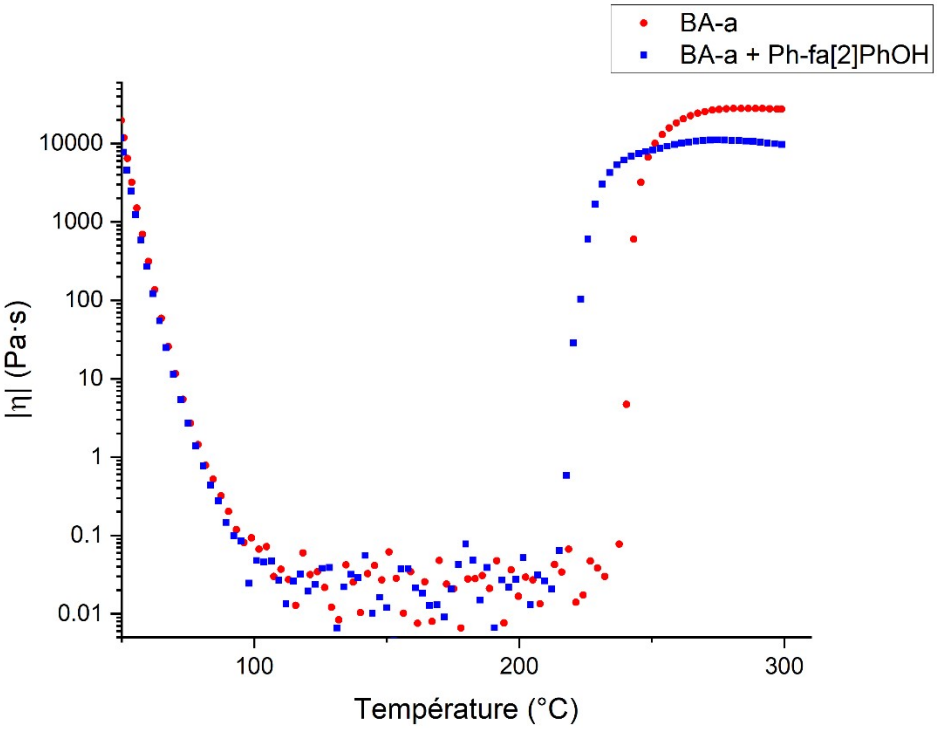

Figure S10 - Complex viscosity of both formulation followed at 10°C·min<sup>-1</sup>

Samples pictures

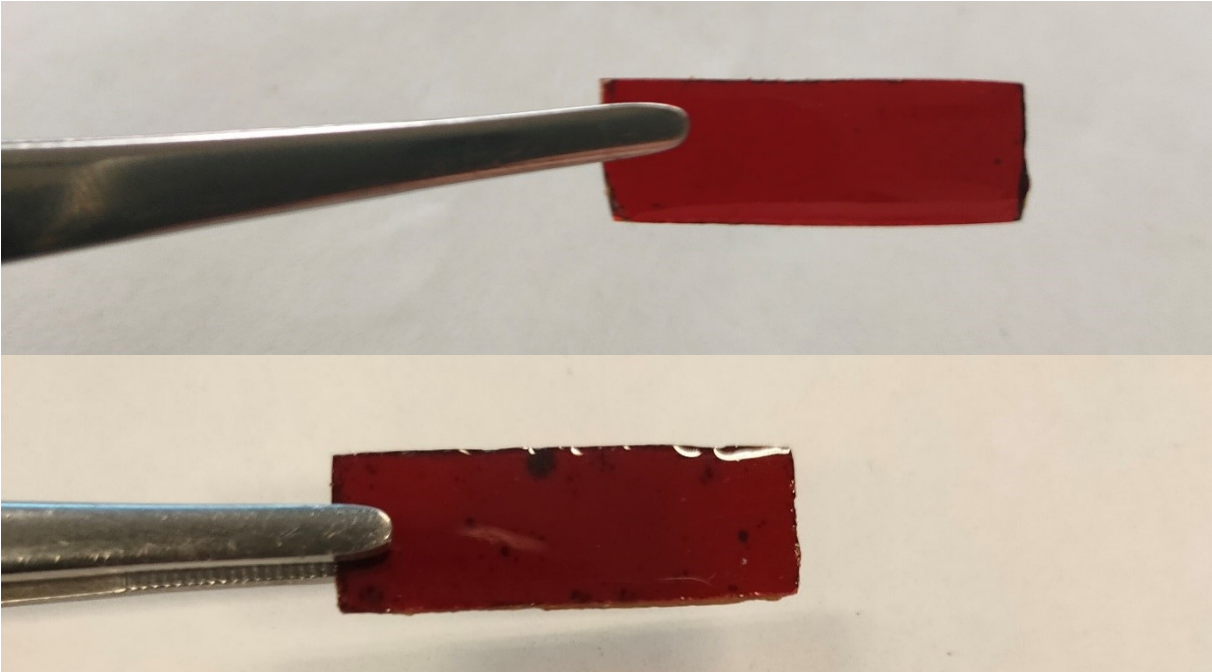

Figure S11 - Pictures of fully cured BA-a (up) and BA-a + 10 wt % Ph-fa[2]PhOH (down)

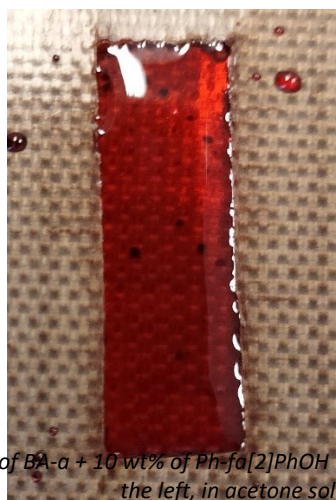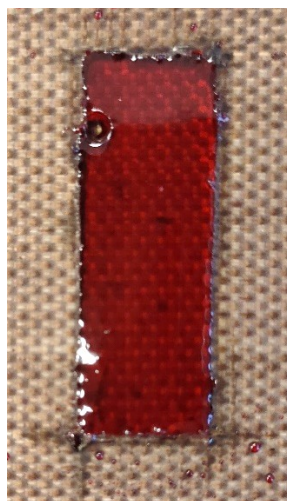

*Figure S12 – Cured samples of BA-a + 10 wt% of Ph-fa[2]PhOH with different homogenization method : in molten state on the left, in acetone solution on the right.*
